# Supplementary material for: Epigenetic silencing of TET2 and TET3 induces an EMT-like process in melanoma
Source: PubMed Central journal article supplement (PMC5352122; doi:10.18632/oncotarget.13324), 2016-11-12
Supplement: oncotarget-08-315-s001.pdf [file oncotarget-08-315-s001.pdf]

## Epigenetic silencing of TET2 and TET3 induces an EMT-like process in melanoma

### Supplementary Materials

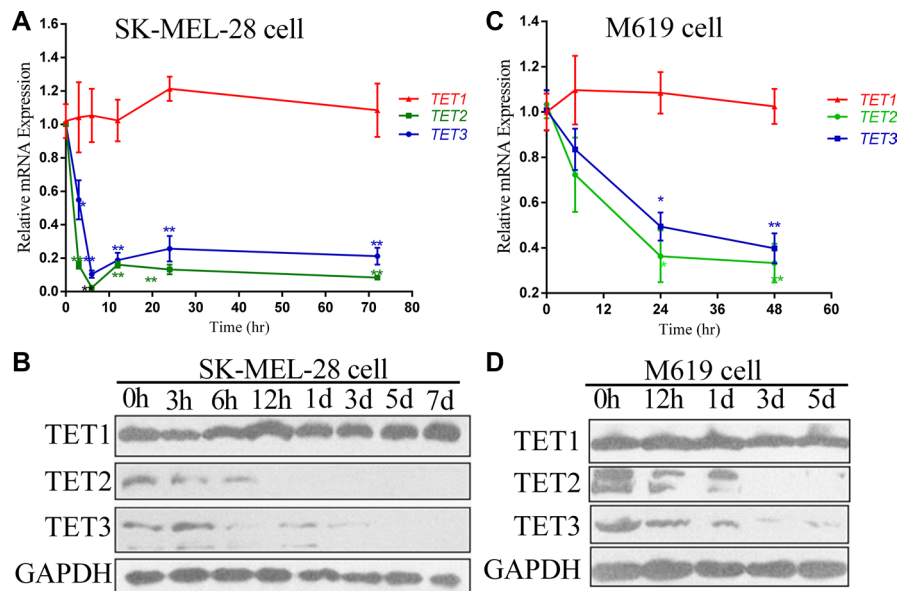

**Supplementary Figure S1: TGF- $\beta$ 1 induces the down regulation of TET2 and TET3 in SK-MEL-28 cells and M619 cells.** The expression levels of TET1, TET2 and TET3 mRNA and protein in SK-MEL-28 cells and M619 cells cultured with TGF- $\beta$ 1 for different times were measured by RT-qPCR (A–C) and immunoblotting (B–D). For RT-qPCR, the data are displayed as the fold change in the expression levels in untreated cells and were normalized by *GAPDH* (Student's *t* test, \* $p < 0.05$ , \*\* $p < 0.01$ ); for immunoblotting, *GAPDH* was used to show that equal amounts of proteins were loaded on the gel.

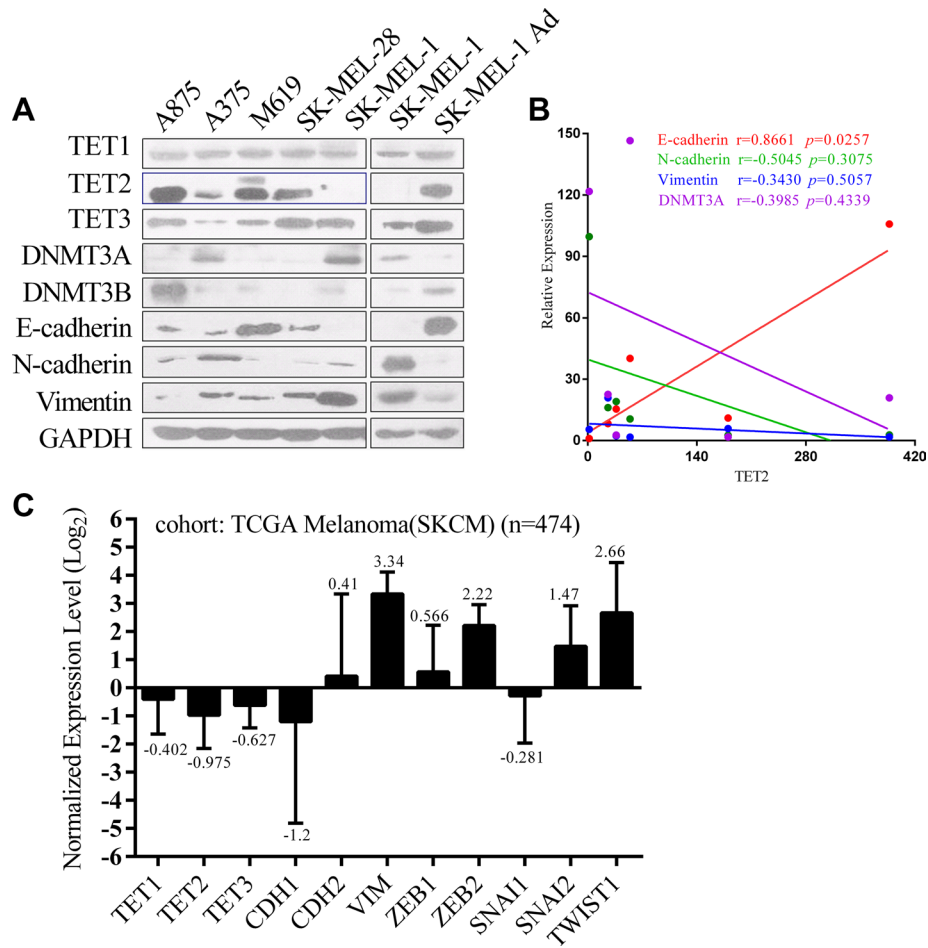

**Supplementary Figure S2: Expression of the TET protein family in different cell lines and human melanomas.** (A) The expression levels of the indicated proteins were detected in 6 different melanoma cell lines by immunoblotting, and GAPDH was used to show that equal amounts of proteins were loaded on the gel; (B) Scatter plots show the Pearson correlations of E-cadherin, N-cadherin, Vimentin, the DNMT3A levels and the TET2 level. The Y-axis represents the relative expression levels of the indicated genes in different cell lines, while the X-axis represents the relative expression levels of TET2 in different cell lines. Correlations ( $r$ ) and corresponding  $p$ -values are indicated in different colors:  $r > 0$  indicates a positive correlation,  $r < 0$  indicates a negative correlation, and  $p < 0.05$  is considered a significant correlation; (C) The expression levels of TET gene family and EMT related genes of TCGA melanoma comprising 474 samples. The X-axis represents different genes and the Y-axis represents the normalized expression levels ( $\text{Log}_2$ ) of the indicated genes.
